# Supplementary material for: Terbium-Based AGuIX-Design Nanoparticle to Mediate X-ray-Induced Photodynamic Therapy
Source: MDPI journal article supplement (doi:10.3390/ph14050396), 2021-04-22
Supplement: s1 [file s1]

Supplementary Materials:

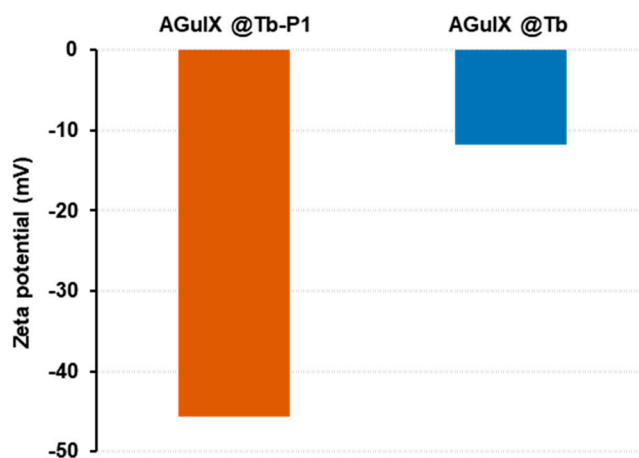

**Figure S1:** Determination of  $\zeta$  potential of AGuIX@Tb-P1 and AGuIX@Tb. AGuIX were diluted in water in the presence of NaCl.  $\zeta$  potential was measured in folded capillary zeta cell. It was estimated at - 46.5 and - 18.1 mV for AGuIX@Tb P1 and AGuIX@Tb, respectively.

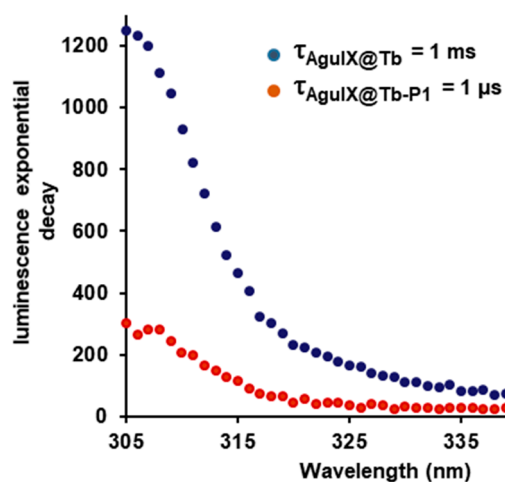

**Figure S2:** Luminescence decay of AGuIX@Tb and AGuIX@Tb-P1 in water. The fluorescence exponential decay at 545 nm was measured after excitation at 351 nm of sample diluted in water. Final concentration was 0.1 mM AGuIX@Tb and 6.6  $\mu\text{M}$  AGuIX@Tb-P1). The derivative of this decay gives the fluorescence lifetime of chelated Tb in AGuIX and was calculated at 1 ms, whereas fluorescence lifetime of AGuIX@Tb-P1 was 1  $\mu\text{s}$ .

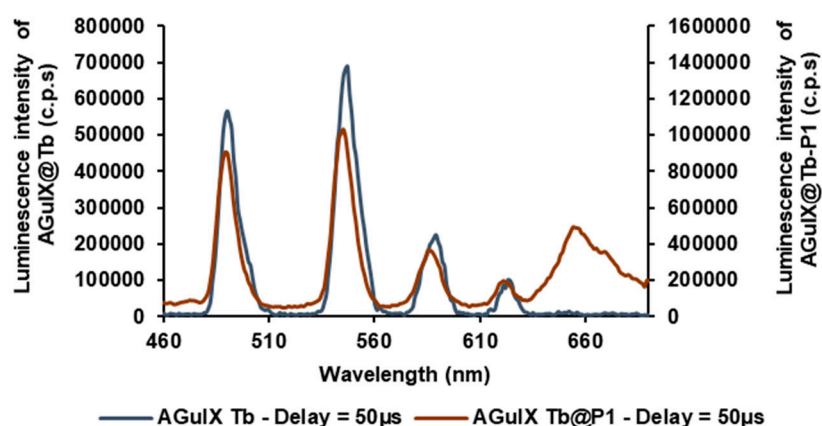

**Figure S3:** Luminescence of AGuIX@Tb-P1. The AGuIX@ nanoparticles were dispersed in water at a concentration of 140  $\mu$ M equivalent porphyrin for AGuIX@Tb-P1 and 2.3 mM for AGuIX@Tb. Each solution was illuminated at 351 nm and photon emission were monitored between 460 and 700 nm with a 50  $\mu$ s delay. The decrease of Tb emission and increase of porphyrin luminescence between 630 and 690 nm is due to the energy transfer between Tb and porphyrin.

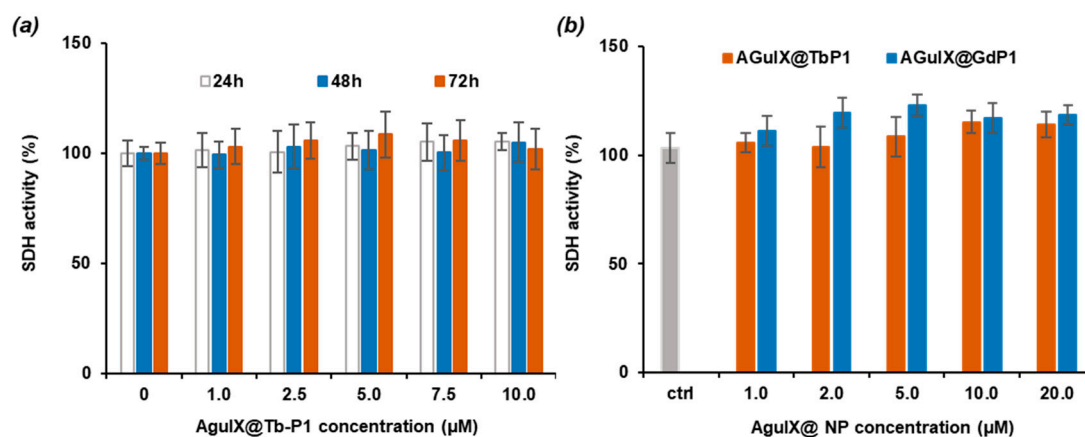

**Figure S4:** SDH activities after U-251 MG cell exposure to AGuIX@ nanoparticles (a) Cells were treated with increasing concentration (1.0 to 10.0  $\mu$ M) of AGuIX@Tb-P1 (P1 equivalent concentration) over three days. (b) Similarly, cells were exposed to increasing concentrations (1.0 to 20.0  $\mu$ M) of AGuIX@Tb-P1 or AGuIX@Gd-P1 for 72 h. In both experiments, succinate dehydrogenase activities (SDH) were evaluated by MTT assays. Results are means  $\pm$  S.D. of at least quadruplicate determinations from two independent experiments (n = 8).
